# Supplementary material
Source: publisher figshare collection journal article supplement (https://acs.figshare.com/ndownloader/files/23567797)
Supplement: Supplementary file 1 [file 23567797]

**Supplementary Information:**

**The Synthesis Success Calculator: Predicting the Rapid Synthesis of DNA Fragments with Machine Learning**

Sean M. Halper<sup>1</sup>, Ayaan Hossain<sup>2</sup>, Howard Salis<sup>1,2,3,4</sup>

<sup>1</sup>Department of Chemical Engineering, <sup>2</sup>Bioinformatics and Genomics, <sup>3</sup>Department of Biological Engineering, <sup>4</sup>Department of Biomedical Engineering, Pennsylvania State University, University Park, PA 16802. Correspondence should be addressed to H.M.S. ([salis@psu.edu](mailto:salis@psu.edu)).

**Supplementary Table 1:** Sequence determinants used for initial model training and feature reduction. Rules were derived from synthesis guidelines from multiple commercial service providers as well as unique metrics developed in this work.

| Feature Type | Feature                                  | Description                                                                                       |
|--------------|------------------------------------------|---------------------------------------------------------------------------------------------------|
| Repeats      | Most frequent repeat count               | Number of copies of most abundant repeat in construct                                             |
|              | Scaled 9-mer repeat metric               | Scaled count of repeated 9-mers divided by length of construct                                    |
|              | High repeat density (70 bp)              | Count of 70 bp windows where 90% of nucleotides participate in a repeat pair                      |
|              | High repeat density (500 bp)             | Count of 500 bp windows where 60% of nucleotides participate in a repeat pair                     |
|              | Repeats in proportion to sequence length | Count of repeats where 40% of total sequence is a specific repeat                                 |
|              | Total repeat density                     | Flag if 69% of nucleotides in the total sequence are participating in any repeat pair             |
|              | Longest Repeat                           | Length of longest maximal repeat                                                                  |
|              | Repeats of length <10 bp                 | Count of maximal repeats less than or equal to 10 bp                                              |
|              | Repeats of length 10-15 bp               | Count of maximal repeats between 11 and 15 bp                                                     |
|              | Repeats of length 15-20 bp               | Count of maximal repeats between 16 and 20 bp                                                     |
|              | Repeats of length 20-25 bp               | Count of maximal repeats between 21 and 25 bp                                                     |
|              | Repeats of length 25-40 bp               | Count of maximal repeats between 26 and 40 bp                                                     |
|              | Repeats of length >40 bp                 | Count of maximal repeats greater than 40 bp                                                       |
|              | Tandem repeats >5 bp                     | Count of repeats 5 or greater separated by 5 or fewer bp                                          |
|              | Terminal repeats                         | Count of repeats longer than 10 bp in the 5' or 3' 60 bp                                          |
| Hairpins     | Hairpins of length >20 bp                | Count of hairpins with a stem length of 20 bp or greater                                          |
|              | Longest hairpin stem                     | Length of longest stem of predicted hairpins in construct                                         |
|              | Palindromes                              | Count of direct palindromes in construct                                                          |
|              | GC richest hairpin                       | Highest GC content of hairpins with high GCs                                                      |
|              | Strong hairpins                          | Count of hairpins with GC content above 80%                                                       |
|              | Terminal hairpins                        | Count of hairpins found in the 5' or 3' 60 bp                                                     |
|              | Large secondary structures               | Secondary structures that sequester 17 contiguous bp of DNA within 100 bp                         |
| GC Content   | High GC (100 bp)                         | Count of 100 bp windows with GC >70%                                                              |
|              | Low GC (100 bp)                          | Count of 100 bp windows with GC <30%                                                              |
|              | High GC (20 bp)                          | Count of 20 bp windows with GC >80%                                                               |
|              | Low GC (20 bp)                           | Count of 20 bp windows with GC <20%                                                               |
|              | High GC (terminal 60 bp)                 | Count of 20 bp windows within 5' or 3' 60 bp where GC >70%                                        |
|              | Low GC (terminal 60 bp)                  | Count of 20 bp windows within 5' or 3' 60 bp where GC <30%                                        |
|              | High Tm (20bp)                           | Count of 20 bp windows with Tm $\geq 70^{\circ}\text{C}$                                          |
|              | Low Tm (20bp)                            | Count of 20 bp windows with Tm $\leq 40^{\circ}\text{C}$                                          |
|              | GC changes (100 bp)                      | Count of 100 bp windows where the GC content of an pair of 20bp subwindows changes by $\geq 50\%$ |
|              | Tm changes (100 bp)                      | Count of 100 bp windows where the Tm of any pair of 20bp subwindows changes by $\geq 30$          |
|              | Total GC content                         | Total GC content of the construct                                                                 |
| Misc         | Construct size                           | Length in bp of the construct of interest                                                         |
|              | Polynucleotide runs                      | Count of poly N runs                                                                              |
|              | Motif runs                               | Count of poly NN or NNN runs                                                                      |
|              | G quadruplexes                           | Count of tandem repeated poly Gs that might result in a g quadruplex                              |
|              | i-motifs                                 | Count of tandem repeated poly Cs that might result in an i -motif                                 |

**Supplementary Table 2:** Design rules used to generate DNA fragment sequences that can not be readily synthesized (negative controls).

| Feature type | Rule                    | Definition                                                                                                                           | values                                                                     |
|--------------|-------------------------|--------------------------------------------------------------------------------------------------------------------------------------|----------------------------------------------------------------------------|
| Repeats      | Single repeats          | N copies of a repeat of length L                                                                                                     | $5 \leq N \leq 10, 14 \leq L \leq 25$                                      |
|              | Multiple repeats        | M unique repeat sets (N copies of a repeat of length L )                                                                             | $3 \leq M \leq 5, 5 \leq N \leq 10, 14 \leq L \leq 25$                     |
|              | Long repeats            | N copies of a repeat of length L                                                                                                     | $3 \leq N \leq 5, 30 \leq L \leq 80$                                       |
|              | Clustered repeats 1     | N copies of a repeat of length L within D bp of each other                                                                           | $2 \leq N \leq 4, 20 \leq L \leq 40, D=160$                                |
|              | Clustered repeats 2     | M unique clustered repeats (N copies of a repeat of length L within D bp of each other)                                              | $3 \leq M \leq 5, 3 \leq N \leq 6, 14 \leq L \leq 25, D=125$               |
| Hairpins     | Tandem repeats          | M instances of N repeats of length L adjacent to each other in the D 5' or 3' terminal nucleotides                                   | $1 \leq M \leq 3, 3 \leq N \leq 5, 15 \leq L \leq 8, D=40$                 |
|              | Long hairpins           | N hairpins with stem length S and loop length L                                                                                      | $2 \leq N \leq 5, 20 \leq S \leq 30, 4 \leq L \leq 10$                     |
|              | Complex hairpins        | N hairpins with stem length S and loop length L                                                                                      | $6 \leq N \leq 10, 10 \leq S \leq 20, 4 \leq L \leq 70$                    |
|              | Palindromes             | N hairpins with stem length S and loop length L                                                                                      | $3 \leq N \leq 6, 10 \leq S \leq 20, L=0$                                  |
|              | Strong hairpins         | N hairpins with stem length S and loop length L, GC content of stems G                                                               | $3 \leq N \leq 6, 10 \leq S \leq 20, 4 \leq L \leq 10, G > 0.75$           |
|              | Terminal hairpins       | N hairpins with stem length S and loop length L in the D 5' or 3' terminal nucleotides                                               | $2 \leq N \leq 4, 12 \leq S \leq 20, 4 \leq L \leq 10, D=60$               |
|              | Strong long hairpins    | N hairpins with stem length S and loop length L, GC content of stems G                                                               | $2 \leq N \leq 5, 20 \leq S \leq 30, 4 \leq L \leq 10, G > 0.75$           |
|              | Strong complex hairpins | N hairpins with stem length S and loop length L, GC content of stems G                                                               | $6 \leq N \leq 10, 10 \leq S \leq 20, 4 \leq L \leq 70, G > 0.6$           |
|              | GC content              | Total GC high                                                                                                                        | N regions of length L have a GC content of G                               |
| GC content   | Total GC low            | N regions of length L have a GC content of G                                                                                         | $20 \leq N \leq 50, 50 \leq L \leq 100, G > 0.7$                           |
|              | 100 bp GC high          | N regions of length L have a GC content of G                                                                                         | $20 \leq N \leq 50, 50 \leq L \leq 100, G < 0.3$                           |
|              | 100 bp GC low           | N regions of length L have a GC content of G                                                                                         | $2 \leq N \leq 5, 90 \leq L \leq 200, G > 0.7$                             |
|              | 20 bp GC high           | N regions of length L have a GC content of G                                                                                         | $2 \leq N \leq 5, 90 \leq L \leq 200, G < 0.3$                             |
|              | 20 bp GC low            | N regions of length L have a GC content of G                                                                                         | $4 \leq N \leq 10, 20 \leq L \leq 40, G > 0.8$                             |
|              | Terminal GC high        | N regions of length L have a GC content of G in the D 5' or 3' terminal nucleotides                                                  | $4 \leq N \leq 10, 20 \leq L \leq 40, G < 0.2$                             |
|              | Terminal GC low         | N regions of length L have a GC content of G in the D 5' or 3' terminal nucleotides                                                  | $1 \leq N \leq 3, 30 \leq L \leq 40, G > 0.8, D=45$                        |
|              | Terminal GC split       | N regions of length L have a GC content of G in the D 5' terminal nucleotides and a GC content of C in the D 3' terminal nucleotides | $1 \leq N \leq 3, 20 \leq L \leq 40, G < 0.2, D=45$                        |
|              | dGC                     | N regions of length L in the construct have subregions of length D with GC contents of G and C, respectively                         | $N=2, 20 \leq L \leq 40, G < 0.2, C > 0.8, D=45$                           |
|              |                         |                                                                                                                                      | $2 \leq N \leq 6, 60 \leq L \leq 120, 30 \leq D \leq 60, G < 0.2, C > 0.8$ |
|              | Other                   | G quadruplexes                                                                                                                       | N instances of D adjacent "GGGNNN" motifs                                  |
|              |                         | i motifs                                                                                                                             | N instances of D adjacent "CCCNNN" motifs                                  |
|              |                         | Mononucleotide runs                                                                                                                  | N mononucleotide regions of length L                                       |
| Other        | Dinucleotide runs       | N regions composed of D adjacent "NN" motifs                                                                                         | $2 \leq N \leq 6, 13 \leq L \leq 25$                                       |
|              | Trinucleotide runs      | N regions composed of T adjacent "NNN" motifs                                                                                        | $2 \leq N \leq 6, 7 \leq D \leq 215$                                       |
|              |                         |                                                                                                                                      | $2 \leq N \leq 6, 5 \leq T \leq 10$                                        |

**Supplementary Table 3:** Hyperparameters used for each random forest used by the Synthesis Success Calculator.

| Round                             | Max features | Class weight | N estimators | Min samples split | Min samples leaf |
|-----------------------------------|--------------|--------------|--------------|-------------------|------------------|
| Feature reduction                 | 'auto'       | None         | 200          | 4                 | 4                |
| Round 1:<br>RandomSearchCV<br>100 | 'auto'       | None         | 600          | 8                 | 4                |
| Round 2:<br>GridSearchCV 50       | 'auto'       | None         | 1200         | 4                 | 3                |
| Round 3:<br>GridSearchCV<br>100   | 'auto'       | None         | 1512         | 5                 | 2                |

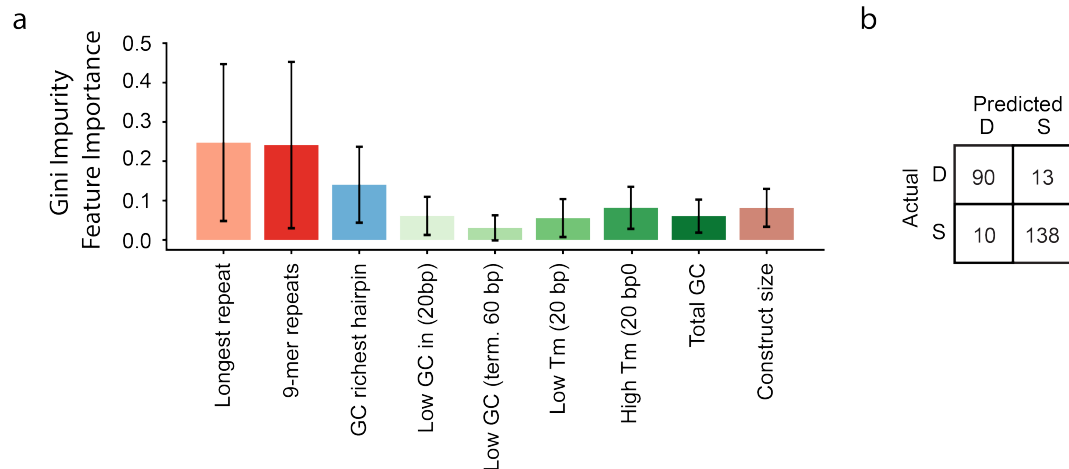

**Supplementary Figure 1:** Classifier features and performance, prior to oversampling. (a) Feature importances based on 575 training datapoints. Error bars represent standard deviation of importances for trees in the forest (n=1512) (b) Predicted and actual synthesis outcomes across 251 DNA fragment sequences in the unseen test set. S: Synthesis success. D: Synthesis failure.

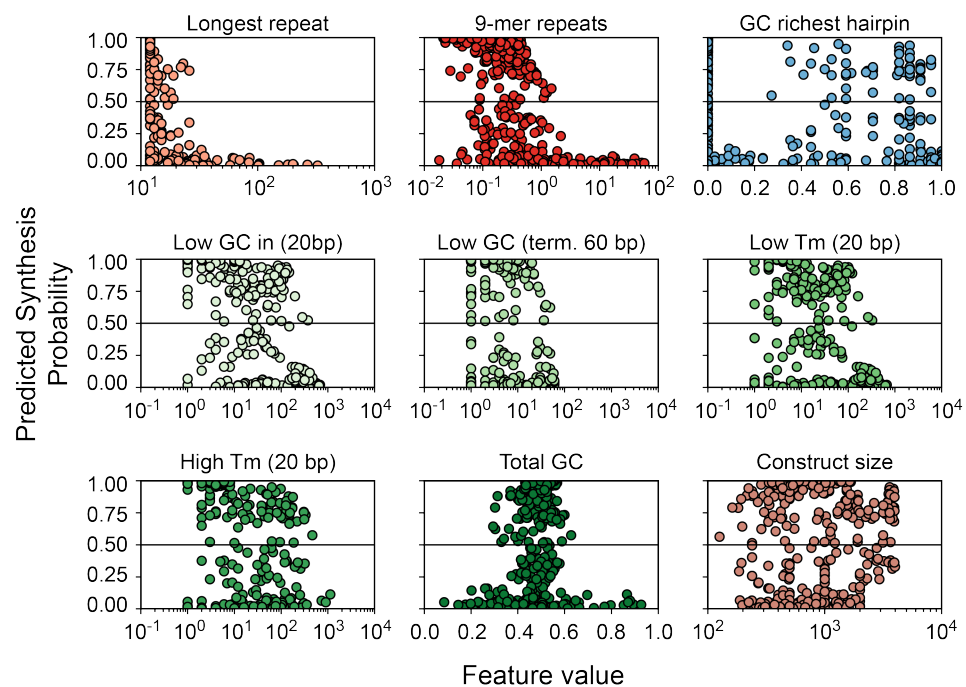

**Supplementary Figure 2:** The predicted probabilities of synthesis success versus feature values across the 595 DNA fragment sequences in the training set and across the reduced feature set.

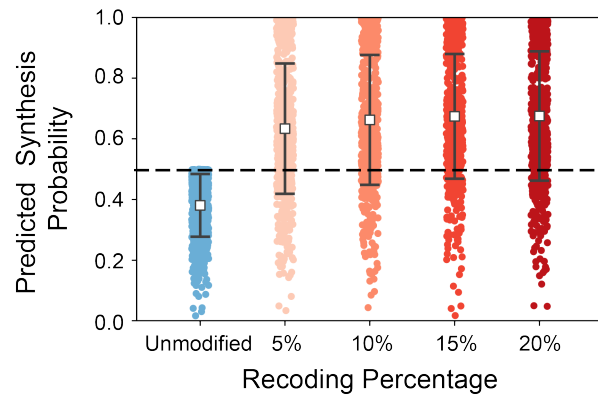

**Supplementary Figure 3:** Improvements to predicted synthesis outcomes for 101 *E. coli* proteins after targeted recoding of their protein coding sequences by 5, 10, 15, or 20% amounts. Squares and error bars represent the mean and standard deviation of the predicted synthesis probabilities across 101 proteins ( $n = 101$ ).
